# Supplementary material
Source: Springer Nature journal article supplement (https://www.springermedizin.de/resource/supplementary/12891_2013_2030_MOESM3_ESM.pdf/9510134)
Supplement: MOESM3 [file 9510134]

### Additional file 3: COREQ framework reporting criteria

| Reporting criterion                             | No (%), n=49 | References for studies reporting criterion                                            |
|-------------------------------------------------|--------------|---------------------------------------------------------------------------------------|
| <i>Characteristics of research team:</i>        |              |                                                                                       |
| Interviewer or facilitator                      | 29 (59)      | [27, 28, 31, 33-36, 38, 39, 41, 43, 45-47, 50-54, 57, 58, 60, 64-67, 69, 71, 73]      |
| Researcher's credentials                        | 13 (27)      | [29, 35-38, 41, 53, 58, 61, 62, 66, 67, 70]                                           |
| Researcher's occupation                         | 16 (33)      | [12, 28, 30, 33, 38, 39, 41, 43, 47, 51, 57, 58, 64, 66, 69, 72]                      |
| Researcher's gender                             | 6 (12)       | [13, 30, 39, 41, 62, 66]                                                              |
| Interviewer/facilitator experience and training | 8 (16)       | [41, 44, 51, 53, 57, 59, 61, 71]                                                      |
| <i>Relationship with participants:</i>          |              |                                                                                       |
| Relationship established                        | 2 (4)        | [53, 66]                                                                              |
| Knowledge of interviewer's background           | 0 (0)        |                                                                                       |
| <i>Methodological theory identified</i>         |              |                                                                                       |
|                                                 | 49 (100)     | [12, 13, 27-73]                                                                       |
| <i>Participant selection:</i>                   |              |                                                                                       |
| Sampling method                                 | 47 (96)      | [12, 13, 27-40, 42-46, 48-73]                                                         |
| Method of approach                              | 28 (57)      | [12, 27, 31-33, 35-38, 42-44, 50-53, 57-61, 63, 64, 66-69, 73]                        |
| Sample size                                     | 49 (100)     | [12, 13, 27-73]                                                                       |
| Refusals or non-participants                    | 23 (47)      | [27, 32, 34, 38, 39, 42, 45, 46, 50, 52, 53, 57-59, 61, 63-67, 69, 71, 72]            |
| <i>Setting:</i>                                 |              |                                                                                       |
| Setting of data collection                      | 26 (53)      | [12, 27, 29, 31-34, 36, 38, 41-43, 45, 46, 48, 51, 53, 54, 62, 64, 65, 67, 69, 71-73] |
| Presence of non-participants                    | 13 (27)      | [28, 29, 39, 51, 53, 54, 62, 63, 67-69, 71, 73]                                       |
| Description of sample                           | 34 (69)      | [12, 13, 27, 28, 30, 32-34, 41, 42, 44-48, 51-53, 56-69, 72, 73]                      |

---

*Data collection:*

|                                      |                |                                                                         |
|--------------------------------------|----------------|-------------------------------------------------------------------------|
| Interview guide used                 | <b>30 (61)</b> | [12, 27, 31-34, 38, 41-48, 50, 51, 53, 55, 56, 59-64, 67-69, 73]        |
| Repeat interviews conducted          | <b>3 (6)</b>   | [27, 30, 39]                                                            |
| Audio or visual recording            | <b>47 (96)</b> | [12, 13, 27-48, 50-56, 58-73]                                           |
| Field notes                          | <b>17 (35)</b> | [12, 13, 28, 32, 39, 42, 48, 51, 53, 54, 60-62, 67-69, 72]              |
| Duration                             | <b>34 (69)</b> | [12, 13, 27, 31-39, 41, 42, 45, 46, 48, 51-53, 57-62, 64, 66-69, 71-73] |
| Data saturation discussed            | <b>19 (39)</b> | [13, 27, 32, 34-36, 38, 39, 51, 53, 59-62, 64, 66, 67, 70, 73]          |
| Transcripts returned to participants | <b>6 (12)</b>  | [49, 51, 53, 54, 65, 67]                                                |

---

*Data analysis:*

|                                           |                |                                                        |
|-------------------------------------------|----------------|--------------------------------------------------------|
| Number of data coders                     | <b>39 (80)</b> | [13, 27-29, 31-34, 38, 39, 41-48, 51-57, 59-67, 69-73] |
| Description of coding tree                | <b>9 (18)</b>  | [12, 32, 41, 44, 66, 68, 69, 71, 72]                   |
| Derivation of themes                      | <b>48 (98)</b> | [12, 13, 27-39, 41-73]                                 |
| Use of software                           | <b>10 (20)</b> | [27, 30, 31, 39, 42, 43, 47, 51, 62, 66]               |
| Participants' feedback or member checking | <b>5 (10)</b>  | [39, 41, 51, 62, 65]                                   |

---

*Reporting:*

|                                 |                 |                                              |
|---------------------------------|-----------------|----------------------------------------------|
| Participant quotations provided | <b>49 (100)</b> | [12, 13, 27-73]                              |
| Data and findings consistent    | <b>49 (100)</b> | [12, 13, 27-73]                              |
| Clarity of major themes         | <b>47 (96)</b>  | [12, 13, 27-31, 33-39, 41-73]                |
| Clarity of minor themes         | <b>38 (78)</b>  | [12, 13, 30, 31, 33-35, 37-51, 57-64, 66-73] |

---
